# Supplementary material for: Ultra-high performance liquid chromatography–tandem mass spectrometry for profiling mercapturic acids in human urine after daily exposure to acrylamide, 3-monochloropropane-1,2-diol and glycidol
Source: Royal Society of Chemistry journal article supplement (doi:10.1039/d5ay00162e), 2025-01-01
Supplement: d5ay00162e1.pdf [file d5ay00162e1.pdf]

## Supplementary Data

# Ultra-high performance liquid chromatography tandem mass spectrometry for profiling mercapturic acids in human urine after daily exposure to acrylamide, 3-monochloropropane-1,2-diol and glycidol

Wei Jia<sup>a,b</sup>, Xing Ke<sup>c</sup>, Anxian Huang<sup>b</sup>, Pan Zhuang<sup>a</sup>, Yiju Zhang<sup>a</sup>, Xuzhi Wan<sup>a</sup>,  
Jingjing Jiao<sup>d</sup>, Ziqing Kong<sup>b,\*</sup>, Yu Zhang<sup>a,\*</sup>

<sup>a</sup> Department of Gastroenterology, The First Affiliated Hospital, Zhejiang University School of Medicine, Hangzhou 310003; Zhejiang Key Laboratory for Agri-Food Resources and High-value Utilization, College of Biosystems Engineering and Food Science, Zhejiang University, Hangzhou 310058, Zhejiang, China

<sup>b</sup> Calibra Lab at DIAN Diagnostics, Hangzhou, 310030, Zhejiang, China; Key Laboratory of Digital Technology in Medical Diagnostics of Zhejiang Provinces, Hangzhou, 310030, Zhejiang, China

<sup>c</sup> Key Laboratory of Drug Prevention and Control Technology of Zhejiang Province, Department of Criminal Science and Technology, Zhejiang Police College, Hangzhou 310053, Zhejiang, China

<sup>d</sup> Department of Endocrinology, The Second Affiliated Hospital, Department of Nutrition, School of Public Health, and Zhejiang University School of Medicine, Hangzhou 310058, Zhejiang, China

\* Corresponding author: Yu Zhang and Ziqing Kong. **E-mail:** y\_zhang@zju.edu.cn (Y.Z.) or ziqing.kong@calibradx.com (Z.K.)

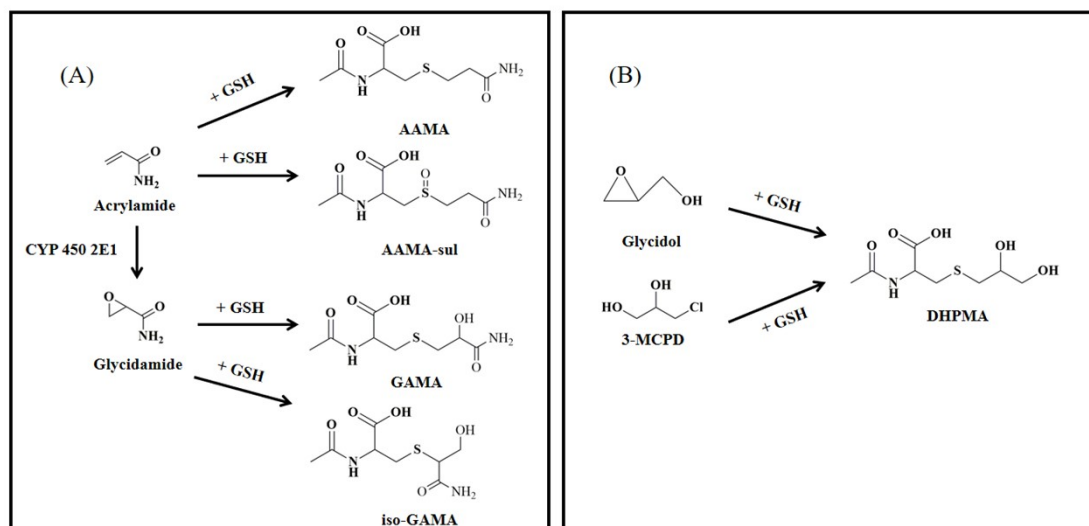

**Figure S1.** The metabolic pathways of the five mercapturic acids of (A) acrylamide and (B) 3-MCPD and glycidol.

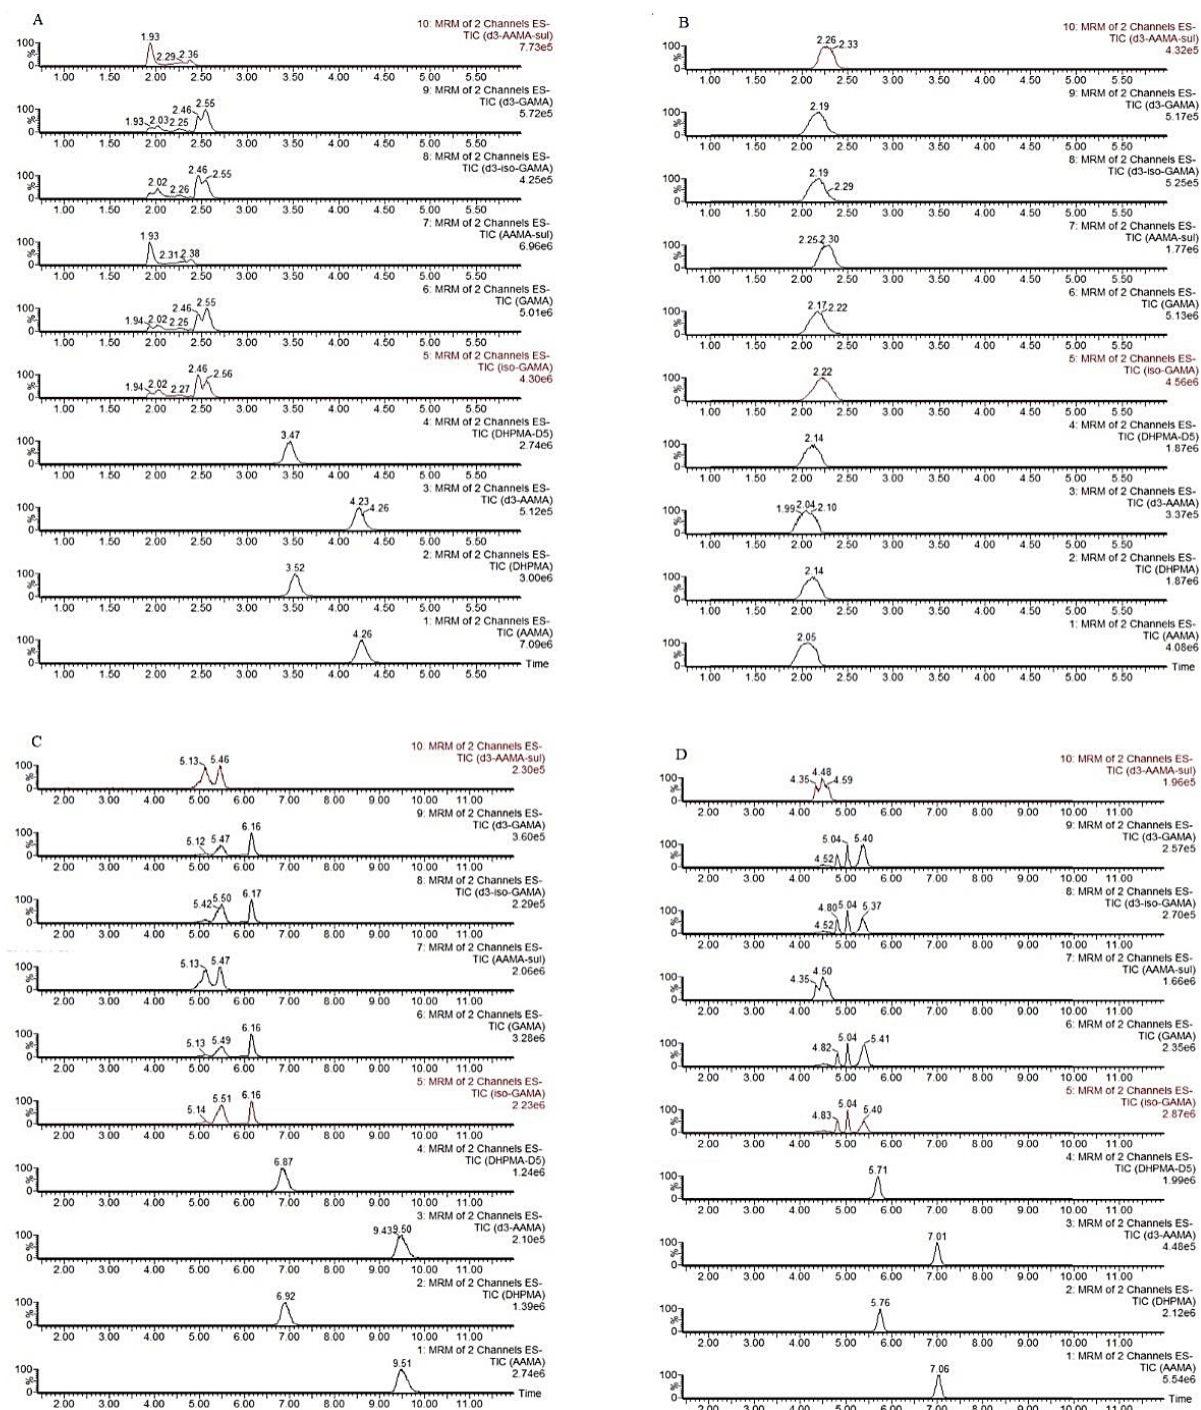

**Figure S2.** UHPLC-MS/MS chromatograms of the five mercapturic acids and their ISs separated by various UHPLC columns with different column lengths, diameters, and partial sizes. Chromatographic separation was performed on (A) Acquity UPLC® BEH C<sub>18</sub> column (2.1×150 mm i.d., 1.7 μm); (B) Acquity UPLC® BEH AMIDE column (2.1×150 mm i.d., 1.7 μm); (C) Acquity UPLC® CSH fluoro-phenyl column (2.1×150 mm i.d., 1.7 μm); and (D) Acquity UPLC® HSS CYANO column (3.0×150 mm i.d., 1.8 μm). MRM channels: 1, AAMA; 2, DHPMA; 3, AAMA-d<sub>3</sub>; 4, DHPMA-d<sub>5</sub>; 5, iso-GAMA; 6, GAMA; 7, AAMA-sul; 8, iso-GAMA-d<sub>3</sub>; 9, GAMA-d<sub>3</sub>; 10, AAMA-sul-d<sub>3</sub>.

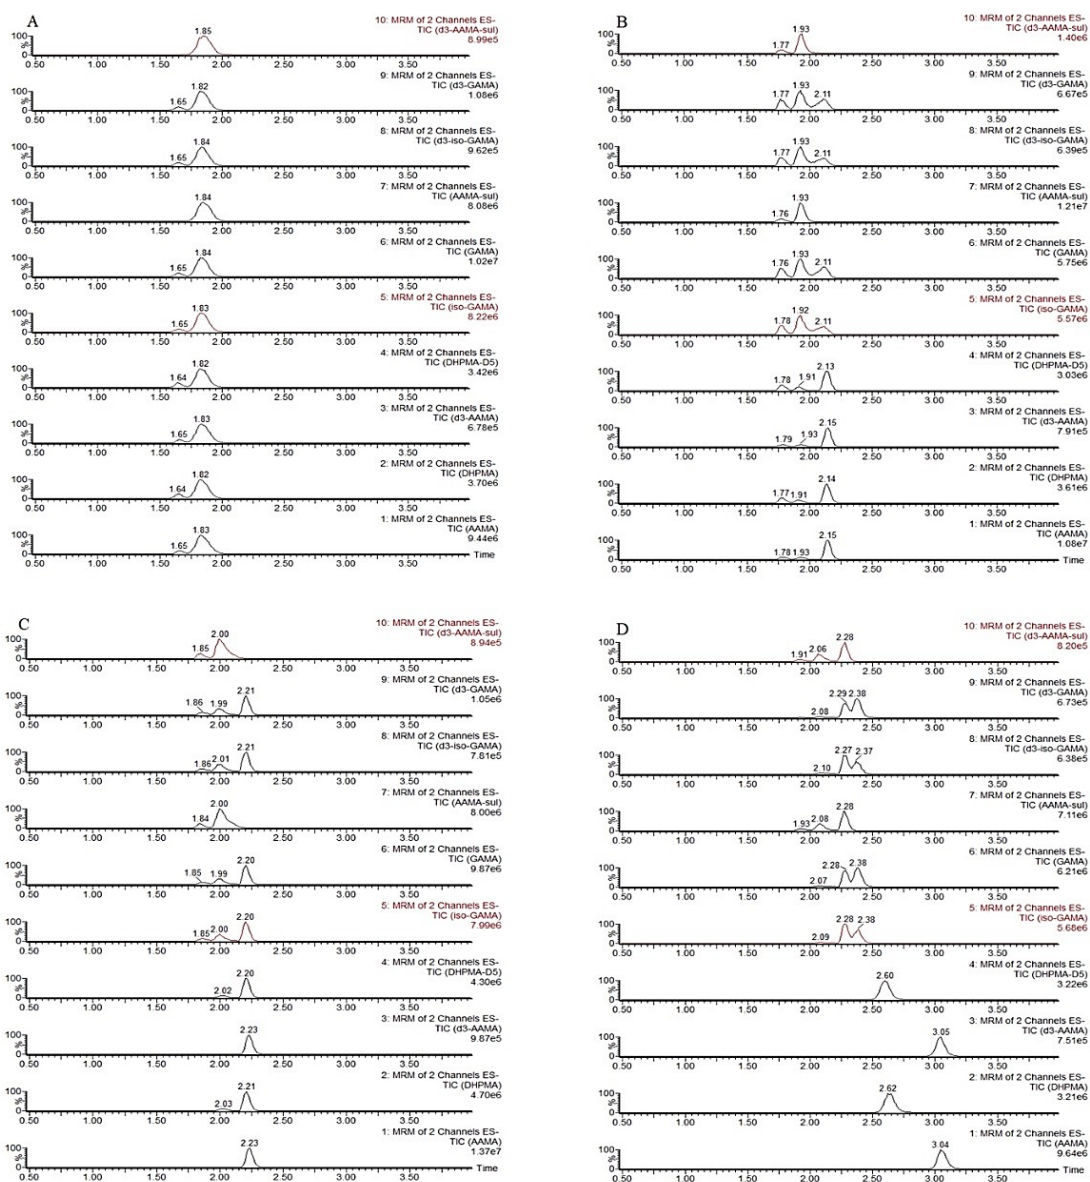

**Figure S3.** UHPLC-MS/MS chromatograms of five mercapturic acids and their ISs separated using various proportions of initial mobile phase (solvent A/solvent B): (A) 50:50, (B) 80:20, (C) 90:10, and (D) 96:4. MRM channels: 1, AAMA; 2, DHPMA; 3, AAMA- $d_3$ ; 4, DHPMA- $d_3$ ; 5, iso-GAMA; 6, GAMA; 7, AAMA-sul; 8, iso-GAMA- $d_3$ ; 9, GAMA- $d_3$ ; 10, AAMA-sul- $d_3$ .

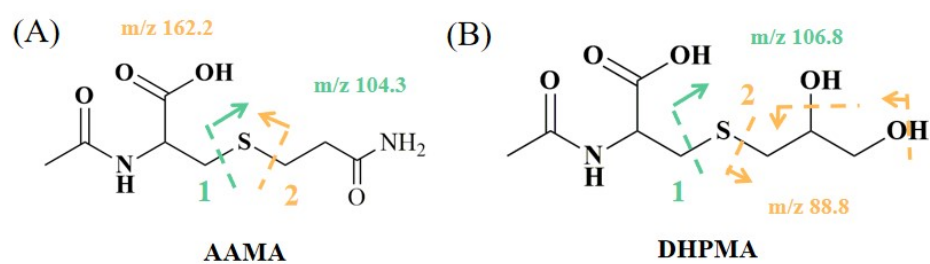

**Figure S4.** Fragmentation mechanisms of (A) AAMA and (B) DHPMA.

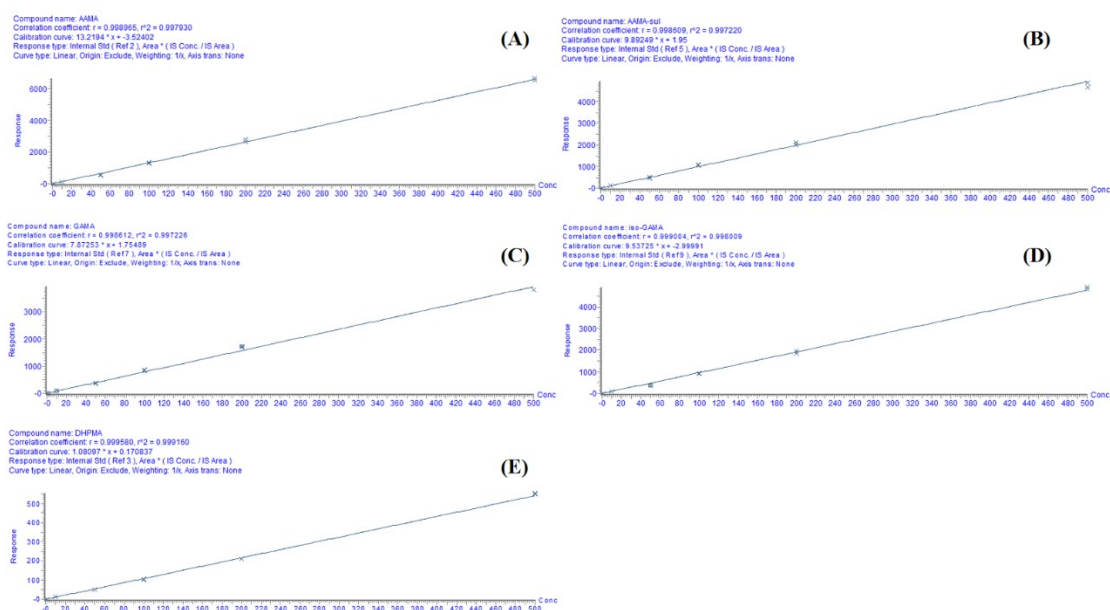

**Figure S5.** Calibration curves of (A) AAMA, (B) AAMA-sul, (C) GAMA, (D) iso-GAMA, and (E) DHPMA.

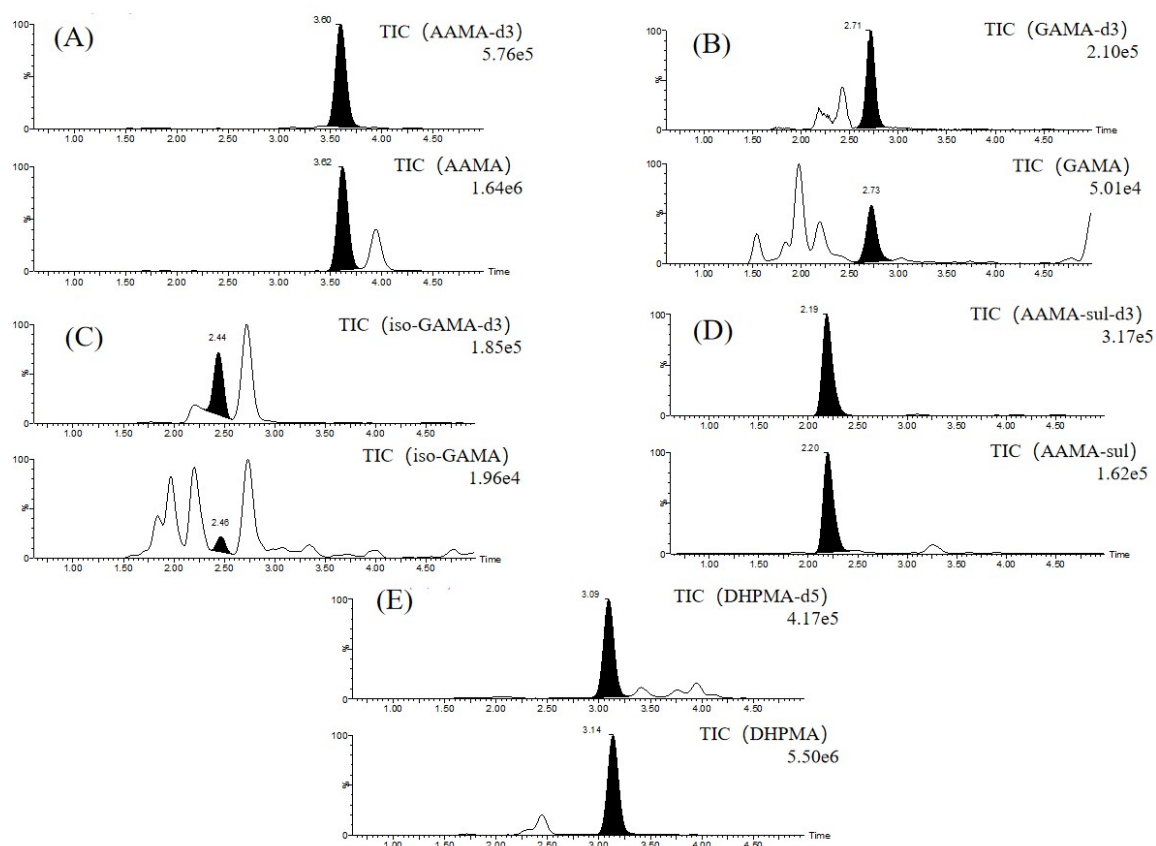

**Figure S6.** Typical UHPLC-MS/MS chromatograms for the simultaneous analysis of the five mercapturic acids and their deuterium-labeled ISs in human urinary samples. (A) AAMA (down layer) and AAMA- $d_3$  (upper layer); (B) GAMA (down layer) and GAMA- $d_3$  (upper layer); (C) iso-GAMA (down layer) and iso-GAMA- $d_3$  (upper layer); (D) AAMA-sul (down layer) and AAMA-sul- $d_3$  (upper layer); (E) DHPMA (down layer) and DHPMA- $d_5$  (upper layer).

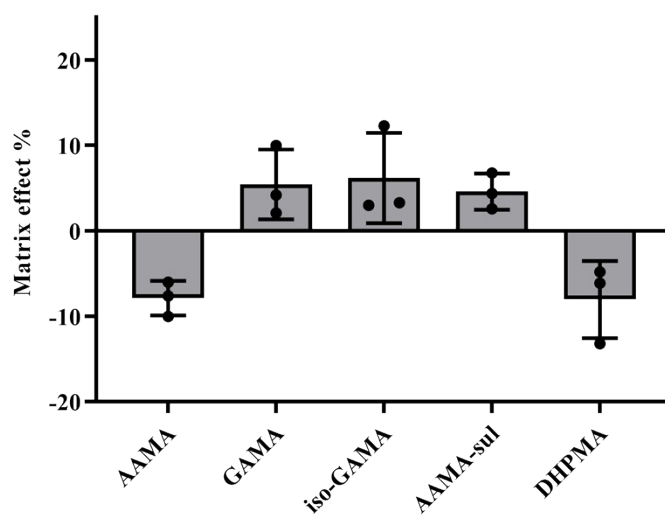

**Figure S7.** Matrix effects of the five mercapturic acids. Data are expressed as mean  $\pm$  s.d. MEs were estimated by comparing the slopes of matrix-matched calibration curves ( $n=3$ ) with those of solvent-based calibration curves ( $n=3$ ) for each of the five mercapturic acid metabolites.



**Table S1.** LODs and LOQs of five mercapturic acids in urine of humans

| Compound | AAMA<br>(ng/mL) | AAMA-sul<br>(ng/mL) | GAMA<br>(ng/mL) | iso-GAMA<br>(ng/mL) | DHPMA<br>(ng/mL) |
|----------|-----------------|---------------------|-----------------|---------------------|------------------|
| LOD      | 0.1             | 0.2                 | 0.3             | 0.3                 | 0.3              |
| LOQ      | 0.3             | 0.7                 | 0.9             | 0.9                 | 0.9              |
